# Supplementary material
Source: PubMed Central journal article supplement (PMC9111799)
Supplement: ENE-29-1663-s001.pdf [file ENE-29-1663-s001.pdf]

**eTable 1. Prospective vs retrospective cases (only confirmed setting and COVID-19 cases)**

|                                   | Prospective<br>(n=309) |            | Retrospective<br>(n=655) |            | p-value |
|-----------------------------------|------------------------|------------|--------------------------|------------|---------|
|                                   | n                      | %          | n                        | %          |         |
| <b>Country</b>                    |                        |            |                          |            | <0.0001 |
| Austria                           | 35                     | 11.33      | 30                       | 4.58       |         |
| Brazil                            | 3                      | 0.97       | 0                        | 0.00       |         |
| Egypt                             | 5                      | 1.62       | 1                        | 0.15       |         |
| Estonia                           | 0                      | 0.00       | 0                        | 0.00       |         |
| France                            | 1                      | 0.32       | 21                       | 3.21       |         |
| Hungary                           | 76                     | 24.60      | 25                       | 3.82       |         |
| Israel                            | 0                      | 0.00       | 30                       | 4.58       |         |
| Italy                             | 48                     | 15.53      | 117                      | 17.86      |         |
| Macedonia                         | 0                      | 0.00       | 1                        | 0.15       |         |
| Moldova                           | 15                     | 4.85       | 103                      | 15.73      |         |
| Norway                            | 50                     | 16.18      | 0                        | 0.00       |         |
| Poland                            | 9                      | 2.91       | 17                       | 2.60       |         |
| Portugal                          | 56                     | 18.12      | 0                        | 0.00       |         |
| Romania                           | 0                      | 0.00       | 84                       | 12.82      |         |
| Russia                            | 0                      | 0.00       | 13                       | 1.98       |         |
| Switzerland                       | 5                      | 1.62       | 37                       | 5.65       |         |
| Tunisia                           | 0                      | 0.00       | 19                       | 2.90       |         |
| Turkey                            | 5                      | 1.62       | 135                      | 20.61      |         |
| Ukraine                           | 1                      | 0.32       | 22                       | 3.36       |         |
| <b>Sex</b>                        |                        |            |                          |            | 0.3672  |
| Male                              | 170                    | 55.02      | 323                      | 49.31      |         |
| Female                            | 136                    | 44.01      | 327                      | 49.92      |         |
| Intersex                          | 1                      | 0.32       | 1                        | 0.15       |         |
| Unknown                           | 2                      | 0.65       | 4                        | 0.61       |         |
| <b>Smoking</b>                    |                        |            |                          |            | 0.0025  |
| Yes                               | 22                     | 7.12       | 98                       | 14.96      |         |
| No                                | 248                    | 80.26      | 477                      | 72.82      |         |
| Unknown                           | 39                     | 12.62      | 80                       | 12.21      |         |
| <b>Source of COVID-19 contact</b> |                        |            |                          |            | 0.0419  |
| Occupation                        | 19                     | 6.15       | 56                       | 8.55       |         |
| Family member                     | 56                     | 18.12      | 111                      | 16.95      |         |
| Social                            | 22                     | 7.12       | 63                       | 9.62       |         |
| Travel                            | 10                     | 3.24       | 6                        | 0.92       |         |
| Other                             | 24                     | 7.77       | 37                       | 5.65       |         |
| Unknown                           | 178                    | 57.61      | 382                      | 58.32      |         |
|                                   | <b>Median<br/>(n)</b>  | <b>IQR</b> | <b>Median<br/>(n)</b>    | <b>IQR</b> |         |
| <b>Age at COVID-19 onset</b>      | 63 (297)               | 47-76      | 63 (605)                 | 48-73      | 0.5396  |
| <b>BMI</b>                        | 26 (239)               | 23-29      | 25 (594)                 | 23-28      | 0.8449  |
|                                   | <b>n</b>               | <b>%</b>   | <b>n</b>                 | <b>%</b>   |         |
| <b>Any comorbidity</b>            | 181                    | 58.58      | 433                      | 66.11      | 0.0233  |
| <b>Hypertension</b>               | 151                    | 48.87      | 350                      | 53.44      | 0.1853  |
| <b>Diabetes Type 1</b>            | 4                      | 1.29       | 4                        | 0.61       | 0.2747  |
| <b>Diabetes Type 2</b>            | 69                     | 22.33      | 136                      | 20.76      | 0.5790  |

|                                                                      |     |       |     |       |         |
|----------------------------------------------------------------------|-----|-------|-----|-------|---------|
| <b>Cardiovascular disease</b>                                        | 94  | 30.42 | 194 | 29.62 | 0.7995  |
| <b>Chronic kidney disease</b>                                        | 30  | 9.71  | 57  | 8.70  | 0.6108  |
| <b>Chronic liver disease</b>                                         | 10  | 3.24  | 27  | 4.12  | 0.5040  |
| <b>Chronic pulmonary disease</b>                                     | 37  | 11.97 | 54  | 8.24  | 0.0645  |
| <b>Anemia</b>                                                        | 19  | 6.15  | 30  | 4.58  | 0.3007  |
| <b>Cancer</b>                                                        | 35  | 11.33 | 49  | 7.48  | 0.0482  |
| <b>Immunosuppressed state</b>                                        | 17  | 5.50  | 32  | 4.89  | 0.6844  |
| <b>Other non-neurological comorbidity</b>                            | 75  | 24.27 | 157 | 23.97 | 0.9184  |
| <b>Dementia</b>                                                      | 29  | 9.39  | 56  | 8.55  | 0.6694  |
| <b>Parkinson's disease</b>                                           | 10  | 3.24  | 25  | 3.82  | 0.6529  |
| <b>Stroke: ICH, ischemic stroke, TIA</b>                             | 31  | 10.03 | 121 | 18.47 | 0.0008  |
| <b>Multiple sclerosis</b>                                            | 7   | 2.27  | 40  | 6.11  | 0.0097  |
| <b>Motor neuron disease</b>                                          | 1   | 0.32  | 3   | 0.46  | 0.7619  |
| <b>Neuromuscular disorder</b>                                        | 5   | 1.62  | 7   | 1.07  | 0.4727  |
| <b>Neuropathy</b>                                                    | 11  | 3.56  | 22  | 3.36  | 0.8727  |
| <b>Other neurological disease</b>                                    | 30  | 9.71  | 69  | 10.53 | 0.6935  |
| <b>COVID systemic complications</b>                                  | 182 | 58.90 | 315 | 48.09 | 0.0017  |
| <b>Dyspnea</b>                                                       | 196 | 63.43 | 302 | 46.11 | <0.0001 |
| <b>Pneumonia</b>                                                     | 188 | 60.84 | 337 | 51.45 | 0.0063  |
| <b>Cardiovascular</b>                                                | 29  | 9.39  | 91  | 13.89 | 0.0479  |
| <b>Renal insufficiency / dialysis</b>                                | 29  | 9.39  | 36  | 5.50  | 0.0246  |
| <b>Coagulation disorder / disseminated intravascular coagulation</b> | 20  | 6.47  | 25  | 3.82  | 0.0681  |
| <b>Refractory shock</b>                                              | 5   | 1.62  | 33  | 5.04  | 0.0109  |
| <b>Extra-corporeal membrane oxygenation (ECMO)</b>                   | 2   | 0.65  | 3   | 0.46  | 0.7027  |
| <b>Mechanical ventilation</b>                                        | 39  | 12.62 | 81  | 12.37 | 0.9109  |
| <b>Neurological findings</b>                                         | 199 | 64.40 | 543 | 82.90 | <0.0001 |
| <b>Headache</b>                                                      | 129 | 41.75 | 258 | 39.39 | 0.4857  |
| <b>Hyposmia / hypogeusia</b>                                         | 109 | 35.28 | 178 | 27.18 | 0.0103  |
| <b>Dysautonomia</b>                                                  | 49  | 15.86 | 89  | 13.59 | 0.3477  |
| <b>Vertigo</b>                                                       | 82  | 26.54 | 110 | 16.79 | 0.0004  |
| <b>Myalgia</b>                                                       | 104 | 33.66 | 175 | 26.72 | 0.0266  |
| <b>Sleep disorders</b>                                               | 72  | 23.30 | 87  | 13.28 | <0.0001 |
| <b>Cognitive impairment (including dysexecutive syndrome)</b>        | 97  | 31.39 | 188 | 28.70 | 0.3931  |
| <b>Hyperactive delirium</b>                                          | 58  | 18.77 | 64  | 9.77  | <0.0001 |
| <b>Hypoactive delirium / acute encephalopathy</b>                    | 55  | 17.80 | 57  | 8.70  | <0.0001 |
| <b>Stupor / coma</b>                                                 | 33  | 10.68 | 91  | 13.89 | 0.1643  |
| <b>Syncope</b>                                                       | 19  | 6.15  | 32  | 4.89  | 0.4135  |
| <b>Seizures / status epilepticus</b>                                 | 38  | 12.30 | 43  | 6.56  | 0.0028  |
| <b>Meningitis / encephalitis</b>                                     | 20  | 6.47  | 22  | 3.36  | 0.0271  |
| <b>Stroke</b>                                                        | 64  | 20.71 | 188 | 28.70 | 0.0084  |

|                                    |     |       |     |       |         |
|------------------------------------|-----|-------|-----|-------|---------|
| <b>Tremor</b>                      | 18  | 5.83  | 49  | 7.48  | 0.3455  |
| <b>Chorea</b>                      | 0   | 0.00  | 1   | 0.15  | 0.4920  |
| <b>Dystonia</b>                    | 3   | 0.97  | 15  | 2.29  | 0.1579  |
| <b>Myoclonus</b>                   | 6   | 1.94  | 9   | 1.37  | 0.5063  |
| <b>Dyskinesia</b>                  | 0   | 0.00  | 12  | 1.83  | 0.0167  |
| <b>Parkinsonism</b>                | 8   | 2.59  | 18  | 2.75  | 0.8868  |
| <b>Ataxia</b>                      | 35  | 11.33 | 51  | 7.79  | 0.0719  |
| <b>Spinal cord disorder</b>        | 15  | 4.85  | 23  | 3.51  | 0.3173  |
| <b>Peripheral neuropathy</b>       | 49  | 15.86 | 42  | 6.41  | <0.0001 |
| <b>Other neurological findings</b> | 39  | 12.62 | 82  | 12.52 | 0.9643  |
| <b>Hospital admission</b>          | 267 | 86.41 | 536 | 81.83 | 0.0755  |
| <b>ICU admission</b>               | 70  | 22.65 | 155 | 23.66 | 0.7293  |
| <b>Pre-morbid mRS</b>              |     |       |     |       | 0.8584  |
| 0                                  | 165 | 55.74 | 320 | 51.61 |         |
| 1                                  | 46  | 15.54 | 105 | 16.94 |         |
| 2                                  | 31  | 10.47 | 64  | 10.32 |         |
| 3                                  | 29  | 9.80  | 66  | 10.65 |         |
| 4                                  | 18  | 6.08  | 45  | 7.26  |         |
| 5                                  | 7   | 2.36  | 20  | 3.23  |         |
| Missing                            | 13  |       | 35  |       |         |
| <b>Discharge mRS</b>               |     |       |     |       | 0.1127  |
| 0                                  | 20  | 27.68 | 11  | 28.11 |         |
| 1                                  | 80  | 15.92 | 181 | 17.24 |         |
| 2                                  | 46  | 15.22 | 111 | 11.18 |         |
| 3                                  | 44  | 16.26 | 72  | 12.73 |         |
| 4                                  | 47  | 8.65  | 82  | 9.63  |         |
| 5                                  | 25  | 6.23  | 62  | 5.12  |         |
| 6                                  | 18  | 10.03 | 33  | 15.99 |         |
| Missing                            | 29  |       | 103 |       |         |

**BMI** = Body mass index; **ICH** = Intracerebral haemorrhage; **ICU** = Intensive care unit; **mRS** = Modified Rankin Score; **TIA** = Transient ischemic attack

**eTable 2. Patients with 6-month follow-up (N = 262)**

|                                   | n                 | %          |
|-----------------------------------|-------------------|------------|
| <b>Country</b>                    |                   |            |
| Austria                           | 20                | 7.63       |
| Brazil                            | 0                 | 0.00       |
| Egypt                             | 1                 | 0.38       |
| Estonia                           | 0                 | 0.00       |
| France                            | 1                 | 0.38       |
| Hungary                           | 9                 | 3.44       |
| Israel                            | 2                 | 0.76       |
| Italy                             | 52                | 19.85      |
| Macedonia                         | 0                 | 0.00       |
| Moldova                           | 33                | 12.60      |
| Norway                            | 50                | 19.08      |
| Poland                            | 1                 | 0.38       |
| Portugal                          | 13                | 4.96       |
| Romania                           | 56                | 21.37      |
| Russia                            | 0                 | 0.00       |
| Switzerland                       | 6                 | 2.29       |
| Tunisia                           | 0                 | 0.00       |
| Turkey                            | 18                | 6.87       |
| Ukraine                           | 0                 | 0.00       |
| <b>Sex</b>                        |                   |            |
| Male                              | 131               | 50.00      |
| Female                            | 130               | 49.62      |
| Intersex                          | 0                 | 0.00       |
| Unknown                           | 1                 | 0.38       |
| <b>Smoking</b>                    |                   |            |
| Yes                               | 25                | 9.54       |
| No                                | 224               | 85.50      |
| Unknown                           | 13                | 4.96       |
| <b>Source of COVID-19 contact</b> |                   |            |
| Occupation                        | 41                | 15.65      |
| Family member                     | 37                | 14.12      |
| Social                            | 19                | 7.25       |
| Travel                            | 11                | 4.20       |
| Other                             | 12                | 4.58       |
| Unknown                           | 142               | 54.20      |
|                                   | <b>Median (n)</b> | <b>IQR</b> |
| <b>Age at COVID-19 onset</b>      | 59 (245)          | 47-71      |
| <b>BMI</b>                        | 26 (244)          | 23-29      |
| <b>Any comorbidity</b>            | 167               | 63.74      |
| <b>Hypertension</b>               | 129               | 49.24      |
| <b>Diabetes Type 1</b>            | 0                 | 0.00       |
| <b>Diabetes Type 2</b>            | 48                | 18.32      |
| <b>Cardiovascular disease</b>     | 59                | 22.52      |

Formattato: Tipo di carattere: Grassetto

|                                                                      |     |       |
|----------------------------------------------------------------------|-----|-------|
| <b>Chronic kidney disease</b>                                        | 16  | 6.11  |
| <b>Chronic liver disease</b>                                         | 8   | 3.05  |
| <b>Chronic pulmonary disease</b>                                     | 33  | 12.60 |
| <b>Anemia</b>                                                        | 10  | 3.82  |
| <b>Cancer</b>                                                        | 25  | 9.54  |
| <b>Immunosuppressed state</b>                                        | 11  | 4.20  |
| <b>Other non-neurological comorbidity</b>                            | 82  | 31.30 |
| <hr/>                                                                |     |       |
| <b>Dementia</b>                                                      | 12  | 4.58  |
| <b>Parkinson's disease</b>                                           | 5   | 1.91  |
| <b>Stroke: ICH, ischemic stroke, TIA</b>                             | 37  | 14.12 |
| <b>Multiple sclerosis</b>                                            | 5   | 1.91  |
| <b>Motor neuron disease</b>                                          | 0   | 0.00  |
| <b>Neuromuscular disorder</b>                                        | 6   | 2.29  |
| <b>Neuropathy</b>                                                    | 4   | 1.53  |
| <b>Other neurological disease</b>                                    | 28  | 10.69 |
| <hr/>                                                                |     |       |
| <b>COVID-19 systemic complications</b>                               | 118 | 45.04 |
| <b>Dyspnea</b>                                                       | 118 | 45.04 |
| <b>Pneumonia</b>                                                     | 145 | 55.34 |
| <b>Cardiovascular</b>                                                | 23  | 8.78  |
| <b>Renal insufficiency / dialysis</b>                                | 21  | 8.02  |
| <b>Coagulation disorder / disseminated intravascular coagulation</b> | 12  | 4.58  |
| <b>Refractory shock</b>                                              | 1   | 0.38  |
| <b>Extra-corporeal membrane oxygenation (ECMO)</b>                   | 4   | 1.53  |
| <b>Mechanical ventilation</b>                                        | 39  | 14.89 |
| <hr/>                                                                |     |       |
| <b>Neurological findings</b>                                         | 199 | 75.95 |
| <b>Headache</b>                                                      | 107 | 40.84 |
| <b>Hyposmia / hypogeusia</b>                                         | 91  | 34.73 |
| <b>Dysautonomia</b>                                                  | 25  | 9.54  |
| <b>Vertigo</b>                                                       | 47  | 17.94 |
| <b>Myalgia</b>                                                       | 76  | 29.01 |
| <b>Sleep disorders</b>                                               | 45  | 17.18 |
| <b>Cognitive impairment (including dysexecutive syndrome)</b>        | 66  | 25.19 |
| <b>Hyperactive delirium</b>                                          | 40  | 15.27 |
| <b>Hypoactive delirium / acute encephalopathy</b>                    | 26  | 9.92  |
| <b>Stupor / coma</b>                                                 | 12  | 4.58  |
| <b>Syncope</b>                                                       | 5   | 1.91  |
| <b>Seizures / status epilepticus</b>                                 | 21  | 8.02  |

|                                    |     |       |
|------------------------------------|-----|-------|
| <b>Meningitis / encephalitis</b>   | 7   | 2.67  |
| <b>Stroke</b>                      | 55  | 20.99 |
| <b>Tremor</b>                      | 11  | 4.20  |
| <b>Chorea</b>                      | 0   | 0.00  |
| <b>Dystonia</b>                    | 1   | 0.38  |
| <b>Myoclonus</b>                   | 2   | 0.76  |
| <b>Dyskinesia</b>                  | 1   | 0.38  |
| <b>Parkinsonism</b>                | 5   | 1.91  |
| <b>Ataxia</b>                      | 13  | 4.96  |
| <b>Spinal cord disorder</b>        | 8   | 3.05  |
| <b>Peripheral neuropathy</b>       | 29  | 11.07 |
| <b>Other neurological findings</b> | 32  | 12.21 |
| <hr/>                              |     |       |
| <b>ICU admission</b>               | 64  | 24.43 |
| <b>Pre-morbid mRS</b>              |     |       |
| 0                                  | 158 | 62.20 |
| 1                                  | 48  | 18.90 |
| 2                                  | 17  | 6.69  |
| 3                                  | 17  | 6.69  |
| 4                                  | 7   | 2.76  |
| 5                                  | 7   | 2.76  |
| Missing                            | 8   |       |
| <b>Discharge mRS</b>               |     |       |
| 0                                  | 65  | 26.32 |
| 1                                  | 49  | 19.84 |
| 2                                  | 41  | 16.60 |
| 3                                  | 44  | 17.81 |
| 4                                  | 31  | 12.55 |
| 5                                  | 17  | 6.88  |
| Missing                            | 15  |       |
| <b>6-month follow-up mRS</b>       |     |       |
| 0                                  | 82  | 32.00 |
| 1                                  | 56  | 21.90 |
| 2                                  | 39  | 15.20 |
| 3                                  | 37  | 14.50 |
| 4                                  | 16  | 6.30  |
| 5                                  | 6   | 2.30  |
| Missing                            | 6   |       |
| <hr/>                              |     |       |

**BMI** = Body mass index; **ICH** = Intracerebral haemorrhage; **ICU** = Intensive care unit;  
**mRS** = Modified Rankin Score; **TIA** = Transient ischemic attack

**eTable 3. General characteristics of patients with new neurological manifestations at 6 months**

| N. | Country     | Age | Sex | Comorbidities                                       | Antec Neuro | COVID-19 complic                                                                                | mRS admission | mRS 6 mos | Sequela                  | New neurological manifestations |
|----|-------------|-----|-----|-----------------------------------------------------|-------------|-------------------------------------------------------------------------------------------------|---------------|-----------|--------------------------|---------------------------------|
| 1  | Austria     | 53  | M   | Diabetes                                            | -           | Pneumonia, Dialysis Coagulation disorders, Headache, Hypogeusia, Myalgia, Peripheral neuropathy | N/A           | 1         | -                        | Myopathy                        |
| 2  | Austria     | 54  | M   | Respiratory dis, Hypothyroidism                     |             | Cardiovascular dis, Headache, Vertigo, Meniere                                                  | 0             | 2         |                          | Paresthesiae                    |
| 3  | Austria     | 69  | F   | Hypertension, Respiratory dis                       | -           | Pneumonia, Cardiovascular dis, Peripheral neuropathy                                            | 0             | 1         | -                        | Sleep disturbances              |
| 4  | Switzerland | 64  | F   | Hypertension, Cardiovascular dis, Liver dis, Anemia |             | Pneumonia, Cardiovascular dis, Hemiparesis, Hemineglect                                         | N/A           | 4         | Hemiparesis, Hemineglect | Vertical diplopia               |
| 5  | Hungary     | 8   | M   | Hypertension                                        | -           | Pneumonia                                                                                       | 0             | 0         | -                        | Fatigue                         |
| 6  | Italy       | 44  | F   | Cardiovascular dis, Gastrointestinal dis            | Dementia    | Seizures                                                                                        | 4             | 4         | Seizures                 | Status epilepticus              |
| 7  | Italy       | 58  | F   | -                                                   | -           | Pneumonia, Headache, Dysautonomia, Vertigo, Myalgia, Cognitive impairment                       | 0             | 1         | Fatigue                  | Paresthesiae                    |
| 8  | Italy       | 68  | M   | -                                                   | -           | Pneumonia, Headache, Myalgia                                                                    | 0             | 0         | -                        | Parkinson                       |
| 9  | Moldova     | 53  | M   | Hypertension, Diabetes, Cardiovascular dis          | -           | Myalgia                                                                                         | 0             | 3         | Hemiparesis              | Seizures                        |
| 10 | Moldova     | 71  | F   | Hypertension, Diabetes                              | Park        | Pneumonia                                                                                       | 0             | 4         | Hemiparesis              | Recurrent stroke                |

N/A = Not available; mRS = Modified Rankin Score
