# Supplementary material
Source: PubMed Central journal article supplement (PMC9111799)
Supplement: ENE-29-1663-s002.pdf [file ENE-29-1663-s002.pdf]

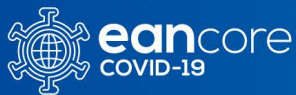

## Ean NEuro-covid ReGistrY (ENERGY)

Patient Number

\_\_\_\_\_ (automatically generated patientcounter)

Data entry is

- prospective  
 retrospective

### Identification

Username

\_\_\_\_\_ (automatically filled out user ID)

Site of visit

- Hospital (Ward/ICU)  
 Emergency Room  
 Outpatient service  
 Other, specify  
 (Where is the patient seen by neurologist)

If site of visit is other, please specify

\_\_\_\_\_

Reason for neurological assessment

- Consultation  
 Other, specify

If reason is other, please specify

\_\_\_\_\_

Date of registration

\_\_\_\_\_ (Date in which the patient was first seen by neurologist (MM/DD/YYYY))

Date of admission

\_\_\_\_\_ (If hospitalized, date of patient admission (MM/DD/YYYY))

### Demographics & History

Year of birth

\_\_\_\_\_ ((YYYY, 4-digits))

Biological sex

- Male  
 Female  
 Intersex  
 Unknown

Patient's height

\_\_\_\_\_ ((in cm, 3-digits))

Patient's weight

\_\_\_\_\_  
 ((in kg, 3-digits))

Current smoker

Yes  No  Unknown

Source of COVID-19 contact

- Occupation  
 Family member  
 Social  
 Travel  
 Unkown  
 Other, specify  
 (Where was the most probable exposure)

If source is other, please specify

\_\_\_\_\_

Date of COVID-19 symptom onset

(If the exact day is unkown, enter 01 as day and check the next question!)

\_\_\_\_\_  
 (Date when the patient started noticing first symptoms (MM/DD/YYYY))

I don't know the exact day

Final COVID-19 status (final diagnosis)

- Suspected  
 Confirmed  
 PCR negative  
 PCR positive (oropharyngeal AND/OR serum AND/OR CSF)  
 Antibodies positive  
 Other, specify  
 (If patient first tested negative and then turned positive, please code as positive. (Multiselect))

If final status is other, please specify

\_\_\_\_\_

### Comorbidities in history

Any comorbidity with impact on patients perceived health? If yes, specify in the next questions

Yes  No  Unkown

Arterial hypertension

Yes  No  Unknown  
 (History of hypertension or taking anti-hypertensive medications prior to admission)

Diabetes

- Type 1  
 Type 2  
 Unkown  
 No  
 Other, specify  
 (History of diabetes (types 1 or 2) or taking antidiabetic medications)

If diabetes is other, please specify

\_\_\_\_\_

|                           | Yes                   | No                    | Unknown               |
|---------------------------|-----------------------|-----------------------|-----------------------|
| Cardiovascular Disease    | <input type="radio"/> | <input type="radio"/> | <input type="radio"/> |
| Chronic kidney disease    | <input type="radio"/> | <input type="radio"/> | <input type="radio"/> |
| Chronic liver disease     | <input type="radio"/> | <input type="radio"/> | <input type="radio"/> |
| Chronic pulmonary disease | <input type="radio"/> | <input type="radio"/> | <input type="radio"/> |
| Anemia                    | <input type="radio"/> | <input type="radio"/> | <input type="radio"/> |
| Cancer                    | <input type="radio"/> | <input type="radio"/> | <input type="radio"/> |
| Immunosuppressed state    | <input type="radio"/> | <input type="radio"/> | <input type="radio"/> |

Cardiovascular Disease: History of cardiovascular disease (myocardial infarction; chronic heart failure, coronary artery disease, peripheral artery disease or taking cardiovascular drugs) Chronic kidney disease: History of any disease affecting renal function (includes undergoing dialysis) Chronic liver disease: History of any disease affecting liver function Chronic pulmonary disease: History of any disease affecting lung function (includes chronic obstructive pulmonary disease, asthma) Anemia: History of decrease in whole-blood Hb concentration requiring treatment Cancer: Any neoplasm with impact on patient's health Immunosuppressed state: Pre-existing immunosuppressed state (taking immunosuppressants/chemotherapy, chronic steroids, hematologic malignancy, HIV, other immunodeficiency syndrome)

Other non-neurological comorbidities  Yes, specify  No  
 Unknown  
 (Any other non-neurological disease with impact on patient's health)

If any other non-neurological comorbidities is yes, please specify \_\_\_\_\_

Premorbid modified Rankin Scale score (mRS) \_\_\_\_\_

(mRS score (0 - 5, 1-digit))

Another complication  Yes, specify  No  
 Unknown  
 (Did the patient develop another complication)

Any neurological disease with impact on patient's health

- Dementia  
 Parkinson's disease  
 Stroke: ICH, ischemic stroke, TIA  
 Multiple sclerosis  
 Motor neuron disease  
 Neuromuscular disorder  
 Neuropathy  
 Other, specify  
 No  
 Unknown  
 ((Check all that apply, multiselect))

If another complication is yes, please specify \_\_\_\_\_

If any other neurological disease, please specify \_\_\_\_\_

Complications: Any complications requiring medical intervention and/or hospitalization

Dyspnea: Shortness of breath not explained by an overt pulmonary disease (e.g. pneumonia, ARDS)

Pneumonia: Did the patient develop clinical or radiographic evidence of pneumonia

Cardiovascular: Did the patient develop cardiovascular complications (including myocardial infarction)

Renal insufficiency/dialysis: Did the patient develop acute kidney injury requiring dialysis/continuous renal replacement therapy (CRRT)

Coagulation disorder/disseminated intravascular coagulation: Did the patient develop any coagulation disorder/disseminated intravascular coagulation

Refractory shock: Did the patient experience refractory shock while hospitalized

Extra-Corporeal Membrane Oxygenation (ECMO): Did the patient require ECMO therapy while hospitalized

Mechanical ventilation: Did the patient receive mechanical ventilation

|                                                                    | Yes                   | No                    | Unknown               |
|--------------------------------------------------------------------|-----------------------|-----------------------|-----------------------|
| Renal insufficiency/dialysis                                       | <input type="radio"/> | <input type="radio"/> | <input type="radio"/> |
| Coagulation disorder<br>/Disseminated intravascular<br>coagulation | <input type="radio"/> | <input type="radio"/> | <input type="radio"/> |
| Refractory shock                                                   | <input type="radio"/> | <input type="radio"/> | <input type="radio"/> |
| Extra-Corporeal Membrane<br>Oxygenation (ECMO)                     | <input type="radio"/> | <input type="radio"/> | <input type="radio"/> |
| Mechanical ventilation                                             | <input type="radio"/> | <input type="radio"/> | <input type="radio"/> |

### New Neurological Findings

Neurological findings at visit

Yes  No

(Did the patient have any neurological complaint)

Neurological findings date

(If the exact day is unknown, enter 01 as day and check the next question!)

(Date of patient developed the first neurological signs and symptoms (DD/MM/YYYY))

I don't know the exact day

|                                             | Yes, not COVID assoc  | Yes, likely COVID assoc | No                    | Unknown               |
|---------------------------------------------|-----------------------|-------------------------|-----------------------|-----------------------|
| Headache                                    | <input type="radio"/> | <input type="radio"/>   | <input type="radio"/> | <input type="radio"/> |
| Hyposmia/Hypogeusia                         | <input type="radio"/> | <input type="radio"/>   | <input type="radio"/> | <input type="radio"/> |
| Dysautonomia                                | <input type="radio"/> | <input type="radio"/>   | <input type="radio"/> | <input type="radio"/> |
| Vertigo                                     | <input type="radio"/> | <input type="radio"/>   | <input type="radio"/> | <input type="radio"/> |
| Myalgia                                     | <input type="radio"/> | <input type="radio"/>   | <input type="radio"/> | <input type="radio"/> |
| Sleep disturbances                          | <input type="radio"/> | <input type="radio"/>   | <input type="radio"/> | <input type="radio"/> |
| Sleepiness/Hypersomnia                      | <input type="radio"/> | <input type="radio"/>   | <input type="radio"/> | <input type="radio"/> |
| Cognitive impairment                        | <input type="radio"/> | <input type="radio"/>   | <input type="radio"/> | <input type="radio"/> |
| Dysexecutive syndrome                       | <input type="radio"/> | <input type="radio"/>   | <input type="radio"/> | <input type="radio"/> |
| Hyperactive delirium                        | <input type="radio"/> | <input type="radio"/>   | <input type="radio"/> | <input type="radio"/> |
| Hypoactive delirium/acute<br>encephalopathy | <input type="radio"/> | <input type="radio"/>   | <input type="radio"/> | <input type="radio"/> |

|                             |                       |                       |                       |                       |
|-----------------------------|-----------------------|-----------------------|-----------------------|-----------------------|
| Stupor/coma                 | <input type="radio"/> | <input type="radio"/> | <input type="radio"/> | <input type="radio"/> |
| Syncope                     | <input type="radio"/> | <input type="radio"/> | <input type="radio"/> | <input type="radio"/> |
| Seizures/status epilepticus | <input type="radio"/> | <input type="radio"/> | <input type="radio"/> | <input type="radio"/> |
| Meningitis/encephalitis     | <input type="radio"/> | <input type="radio"/> | <input type="radio"/> | <input type="radio"/> |
| Stroke                      | <input type="radio"/> | <input type="radio"/> | <input type="radio"/> | <input type="radio"/> |

Headache: Did the patient develop new on set headache before or or during hospitalization for COVID 19 (self report or family report)

Hyposmia/Hypogeusia: Did patient have abnormal smell or taste before or during hospitalization/clinical visit for COVID-19 (self-reported or family reported)

Dysautonomia: Did the patient exhibit signs/symptoms of dysautonomia

Vertigo: Did the patient report about dizziness with the feeling that (s)he or the objects around are moving when they are not

Myalgia: Did patient develop/complain about myalgia

Sleep disturbances: Did the patient complain/exhibit a disturbance of sleep or a non-restorative sleep

Sleepiness/Hypersomnia: Did patient develop excessive daytime sleepiness (involuntary napping, daily) and/or hypersomnia (>10 hours sleep/24h)

Cognitive impairment: Did the patient develop any symptoms of higher functions impairment (amnesia, aphasia, apraxia, agnosia, etc)

Dysexecutive syndrome: Does the patient present inattention, disorientation, poorly organized movements in response to command in off-sedation

Hyperactive delirium: Did the patient develop delirium (acute mental disturbance characterized by confused thinking and disrupted attention often accompanied by impaired speech or hallucinations)

Hypoactive delirium/acute encephalopathy: Did patient develop new onset altered mental status before or during hospitalization for COVID 19, EXCLUDING direct medication effect or hypotension (MAP < 60 mmHg)

Stupor/coma: Did patient develop stupor or coma (no speech, absent purposeful movements/reaction to painful stimuli, no eye opening or only for a short time even after painful stimuli)

Syncope: Did the patient exhibit transient loss of consciousness due to an insufficient blood flow to the brain

Seizures/status epilepticus: Did the patient present with transient or prolonged disruption of the brain's electrical activity accompanied by altered consciousness and/or other neurological and behavioural manifestations

Meningitis/encephalitis: Did patient have meningitis or encephalitis (confirmed by CSF findings)

Stroke: Is the patient exhibiting signs of acute stroke (confirmed by neuroimaging)

Does the patient present any of new observed movement disorders

|                       | Yes, not COVID assoc  | Yes, likely COVID assoc | No                    | Unknown               |
|-----------------------|-----------------------|-------------------------|-----------------------|-----------------------|
| Tremor                | <input type="radio"/> | <input type="radio"/>   | <input type="radio"/> | <input type="radio"/> |
| Chorea                | <input type="radio"/> | <input type="radio"/>   | <input type="radio"/> | <input type="radio"/> |
| Dystonia              | <input type="radio"/> | <input type="radio"/>   | <input type="radio"/> | <input type="radio"/> |
| Myoclonus             | <input type="radio"/> | <input type="radio"/>   | <input type="radio"/> | <input type="radio"/> |
| Dyskinesia            | <input type="radio"/> | <input type="radio"/>   | <input type="radio"/> | <input type="radio"/> |
| Parkinsonism          | <input type="radio"/> | <input type="radio"/>   | <input type="radio"/> | <input type="radio"/> |
|                       | Yes, not COVID assoc  | Yes, likely COVID assoc | No                    | Unknown               |
| Ataxia                | <input type="radio"/> | <input type="radio"/>   | <input type="radio"/> | <input type="radio"/> |
| Spinal cord disorder  | <input type="radio"/> | <input type="radio"/>   | <input type="radio"/> | <input type="radio"/> |
| Peripheral neuropathy | <input type="radio"/> | <input type="radio"/>   | <input type="radio"/> | <input type="radio"/> |

Ataxia: Did patient have ataxia (lack of voluntary coordination of muscle movements that can include gait abnormality, speech changes, and abnormalities in eye movements)

Spinal cord disorder: Did patient show signs of myelopathy or evidence of myelitis (confirmed by CSF)

Peripheral neuropathy: Any type of impairment of peripheral nervous system

Other new neurological findings  Yes - not COVID assoc  
 No  
 Yes - likely COVID assoc  
 Unknown  
 (Did the patient develop other new neurological symptoms or signs)

If other findings is yes, please specify \_\_\_\_\_

### Additional Diagnostic Tools

CSF performed  Yes  No  Unknown  
 (Did the patient undergo a lumbar puncture)

If abnormal, please specify  Yes - not COVID assoc  
 No  Yes - likely COVID assoc  
 Unknown

CT/MRI  Yes  
 No  
 Findings assoc. with neuro disease  
 Unknown  
 (Did the patient undergo neuroimaging)

If abnormal, please specify  Yes - not COVID assoc  
 No  Yes - likely COVID assoc  
 Unknown

### Outcome

|                                           | Yes                   | No                    | Unknown               |
|-------------------------------------------|-----------------------|-----------------------|-----------------------|
| Was the patient admitted to the hospital? | <input type="radio"/> | <input type="radio"/> | <input type="radio"/> |
| Was the patient admitted to the ICU?      | <input type="radio"/> | <input type="radio"/> | <input type="radio"/> |

Status at discharge/visit

Modified Rankin Scale score (mRS) (Discharge/visit)

\_\_\_\_\_  
 (mRS score at discharge (0 - 6, 1-digit))

If (mRS=6): Date of death

\_\_\_\_\_  
 ((MM/DD/YYYY))

If (mRS=6): Autopsy performed

Yes  No  Unknown

If (mRS=0-5): Date of discharge

\_\_\_\_\_  
 ((MM/DD/YYYY))

**NCC Questionnaire Supplementary**

NCC additional values

Yes  No  
(Optionally you have the possibility to fill out the NCC CRF)

Patient's ethnicity

Hispanic or Latino  
 Not Hispanic or Latino  
 Unknown  
 Not reported  
 Other, specify  
 (self-reported)

If patient's self-reported ethnicity is other, define

\_\_\_\_\_

Empiric COVID 19 treatment

None  
 Hydroxychloroquine  
 Zithromax  
 H+Z combo  
 IVIG  
 Remdesivir  
 lopinavir/ritonavir  
 Other, specify  
 (What empiric COVID 19 treatment(s) was given)

If empiric COVID 19 treatment is other, which?

\_\_\_\_\_ (Empiric COVID 19 tx (other))

Pre-Existing Code Status

Full  DNR  DNI  
 CMO  Other  
 (Pre-existing code status prior to presentation to hospital)

ATII-RA

Yes  No  
 (Did the patient receive angiotension -II-receptor antagonists within last 30 days before admission)

Corticosteroids

Yes  No  
 (Did the patient take nonsteroidal or corticosteroids 30 days prior to admission)

Other immunosuppressives

Yes  No  
 (Did the patient receive other immunosuppressive medications)

Plegia/paralysis

Yes, specify  No  
 (Did patient develop new plegia/paresis, including single limb plegia/paresis, hemiplegia/paresis, and quadriplegia/paresis)

If plegia/paralysis is yes, please specify

\_\_\_\_\_ (Describe new plegia or paralysis including limb, location)

Aphasia

Yes  No  
 (Did patient present with new aphasia or develop aphasia during hospitalization)

Abnormal tone  Yes, specify  No  
(Did the patient have abnormal tone)

If description of abnormal is other, please specify

\_\_\_\_\_  
(If abnormal tone, describe (other))

Movement disorder

- Tremor  
 Stiffness  
 Change in facial expression  
 Disturbances of dexterity  
 Micrographia  
 Weakness  
 Dystonia  
 Ambulatory/Axial Difficulties-Freezing  
 Ambulatory/Axial Difficulties-Lack of arm swing  
 Ambulatory/Axial Difficulties-Leg dragging  
 Ambulatory/Axial Difficulties-Shuffling of gait  
 Ambulatory/Axial Difficulties-Postural imbalance  
 Ambulatory/Axial Difficulties-Falls  
 Ambulatory/Axial Difficulties-Slowness of gait  
 Ambulatory/Axial Difficulties-Stooped posture  
 Ambulatory/Axial Difficulties-Other abnormality of posture or gait  
 other, specify  
 (Indicate the type of new movement disorder experienced)

If movement disorder is other, please specify

\_\_\_\_\_

Abnormal brainstem reflexes

- abnormal corneal  
 abnormal pupillary  
 abnormal cough  
 abnormal gag  
 no abnormal reflexes  
 other, specify  
 (Specify if any of the following brainstem reflexes abnormal)

If abnormal brainstem reflexes is other, specify

\_\_\_\_\_

Did patient exhibit or report new sensory symptoms

- Yes  
 No  
 (Did patient exhibit or report new sensory symptoms)

Best GCS

\_\_\_\_\_  
(BEST documented Glasgow Coma Score AFTER onset of severe neurological complication. For intubated patients: please use imputed GCS (1 - 15))

Baseline Oxygen Saturation (SPO2)

\_\_\_\_\_  
((0.000 - 100.000))



---

Baseline respiratory rate

---

((0 - 50))

---

Baseline arterial blood gas Ph  
(first available since acute hospital admission)

---

((6.00 - 8.00))

---

Baseline arterial blood gas PaO2  
(first available since acute hospital admission)

---

((10.00 - 200.00))

---

Baseline arterial blood gas PaCO2  
(first available since acute hospital admission)

---

((10.00 - 100.00))

---

Baseline arterial blood gas HCO3  
(first available since acute hospital admission)

---

((10.00 - 40.00))

---

Baseline arterial blood gas O2 sat

---

((40 - 100))

---

Pre-intubation Oxygen Saturation (SPO2)

---

((0 - 100))

---

Pre-intubation Respiratory Rate

---

((0 - 50))

---

Pre-intubation arterial blood gas Ph

---

((6.00 - 8.00))

---

Pre-intubation arterial blood gas PaO2

---

((10.00 - 200.00))

---

Pre-intubation arterial blood gas PaCO2

---

((10.00 - 100.00))

---

Pre-intubation arterial blood gas HCO3

---

((10.00 - 40.00))

---

Pre-intubation arterial blood gas O2 sat

---

((40 - 100))

---

Days on Mechanical Ventilation

---

((0 - 60))

---

WBC on presentation

\_\_\_\_\_  
 ((0.00 - 50.00) (unit: 10<sup>9</sup>/L))

---

Lymph on presentation

\_\_\_\_\_  
 ((0.00 - 50.00) (unit: 10<sup>9</sup>/L))

---

Neuroimaging type

- CT scan head  
 MRI head  
 MRI spine  
 none  
 other, specify  
 (Describe the type of neuroimaging performed  
 (Multiselect))
- 

If neuroimaging type is other, please specify

\_\_\_\_\_

---

ICU LOS

\_\_\_\_\_  
 (Number of days patient received care in the  
 critical care unit (0 - 100))

---

Hospital LOS

\_\_\_\_\_  
 (Number of days patient received care in the  
 hospital (0 - 100))

---

Discharge disposition

- home  
 nursing home/SNF  
 LTACH  
 hospice  
 acute rehab  
 subacute rehab  
 other, specify  
 (State the discharge location )
- 

If discharge disposition type is other, please specify

\_\_\_\_\_  
 (Discharge disposition (other))

---

## Finally

Any comment

\_\_\_\_\_
